# Supplementary material for: Rapid laser ablation-based fabrication of high-density polymer microwell arrays for high-throughput cellular studies
Source: Royal Society of Chemistry journal article supplement (doi:10.1039/d4lc01058b), 2025-01-01
Supplement: d4lc01058b1.pdf [file d4lc01058b1.pdf]

## Supporting Information for

### **Rapid laser ablation-based fabrication of high-density polymer microwell arrays for high-throughput cellular studies**

Desh Deepak Dixit<sup>a</sup>, Kavya L. Singampalli<sup>b,c</sup>, Amit Niyogi<sup>a</sup>, Amanda Montoya<sup>d</sup>, Alexandre Reuben<sup>d</sup>, Peter B. Lillehoj<sup>a,c\*</sup>

<sup>a</sup> Department of Mechanical Engineering, Rice University, Houston, TX, USA

<sup>b</sup> Medical Scientist Training Program, Baylor College of Medicine, Houston, TX, USA

<sup>c</sup> Department of Bioengineering, Rice University, USA

<sup>d</sup> Department of Thoracic/Head and Neck Medical Oncology, Division of Cancer Medicine, The University of Texas MD Anderson Cancer Center, Houston, TX, USA

\*Corresponding author: lillehoj@rice.edu

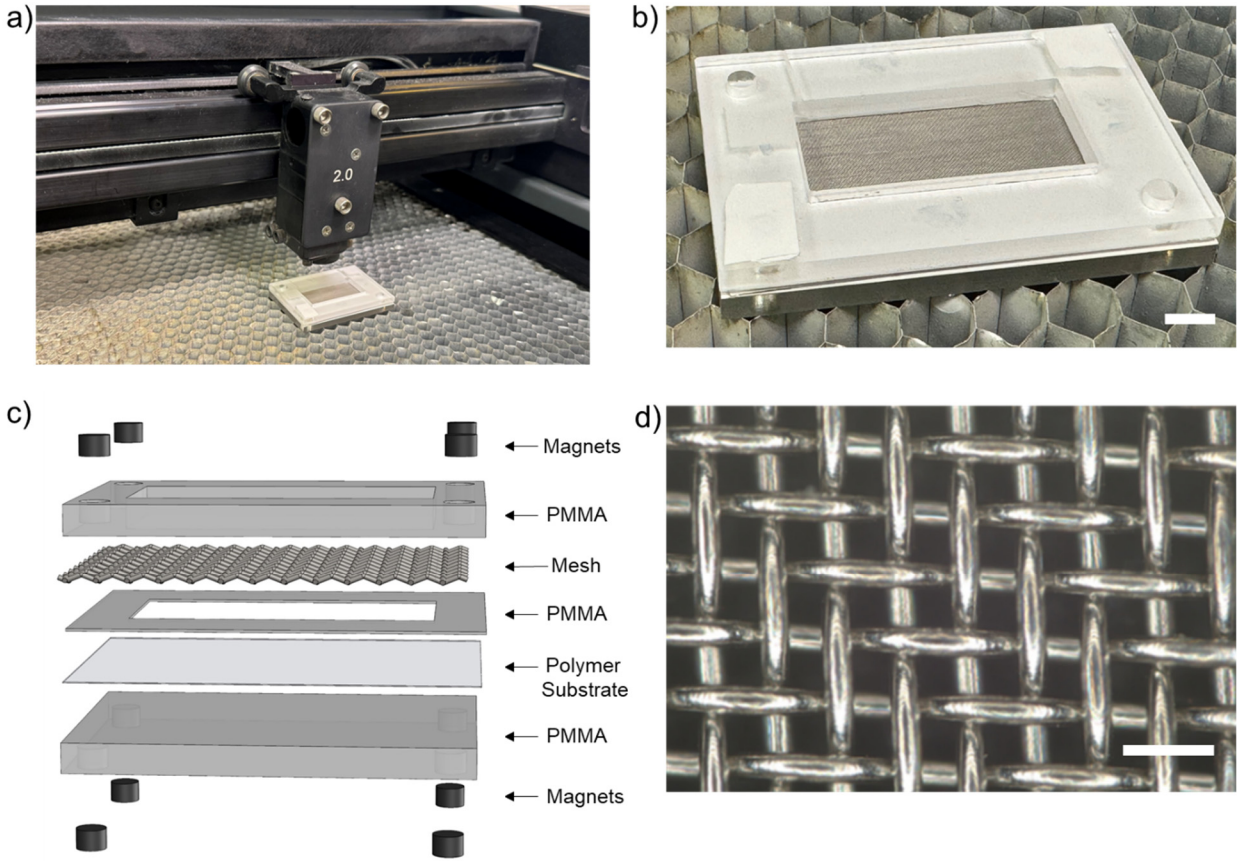

**Figure S1.** Overview of the experimental setup for laser ablation-based fabrication of polymer microwell arrays. (a) Photograph of the fixture placed inside the CO<sub>2</sub> laser cutting/engraving system. (b) Photograph showing a close-up view of the fixture. Scale bar, 5 mm. (c) Exploded view of the fixture. (d) Optical micrograph showing a close-up view of the stainless steel 325 × 325 mesh. Scale bar, 100 μm.

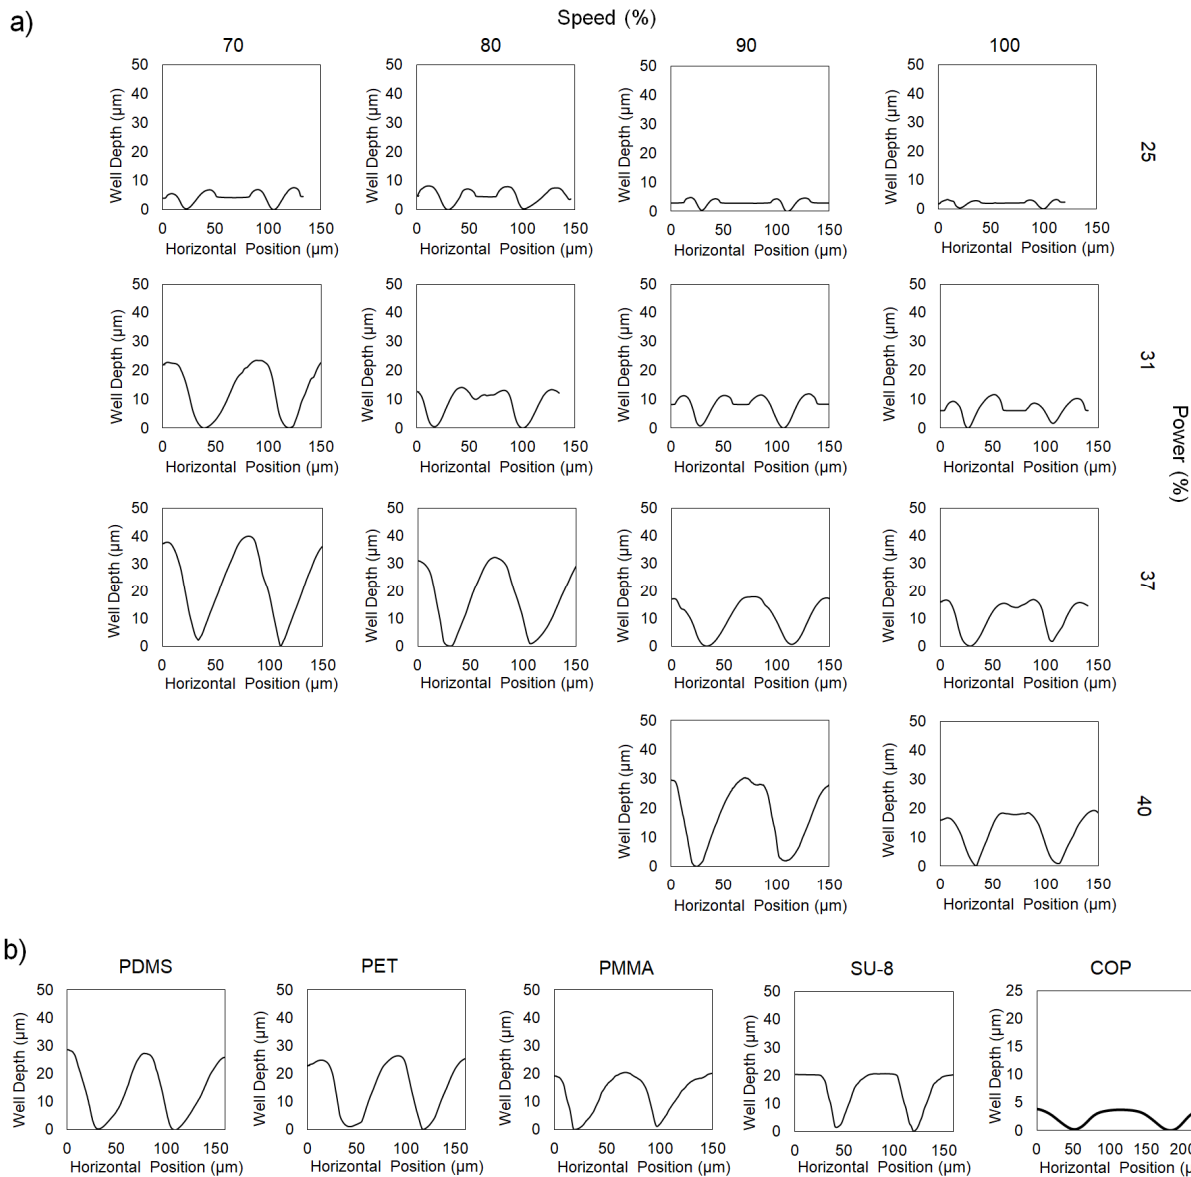

**Figure S2.** Cross-sectional profiles of microwells. (a) Profiles of microwells in cellulose acetate fabricated using a  $325 \times 325$  mesh with different combinations of laser power and rasting speed. (b) Profiles of microwells in PDMS, PET, PMMA and SU-8 fabricated using a  $325 \times 325$  mesh, and microwells in COP fabricated using a  $200 \times 200$  mesh.

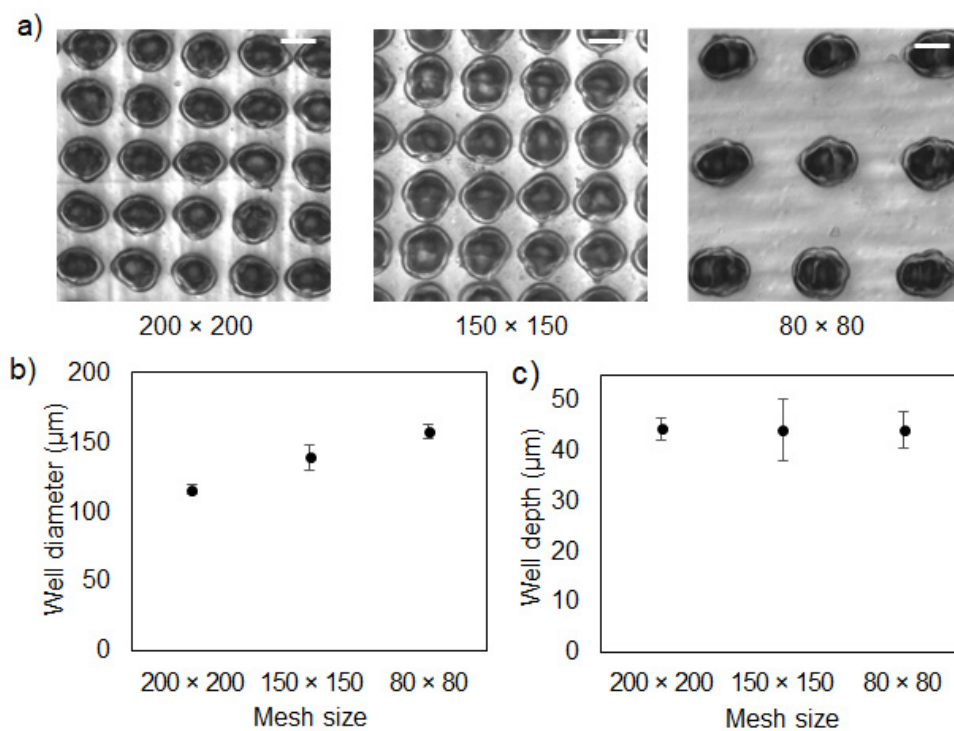

**Figure S3.** Characterization of microwells fabricated using meshes with larger mesh sizes. (a) Optical micrographs of cellulose acetate microwells fabricated using a  $200 \times 200$  mesh, a  $150 \times 150$  mesh and a  $80 \times 80$  mesh with 15% power and 100% speed. Scale bars,  $100 \mu\text{m}$ . Plots of (b) microwell diameter and (c) microwell depth for microwells fabricated with different mesh sizes. Each data point represents the mean  $\pm$  SD of 30 independent measurements.

**Theoretical Modeling of Microwell Volume.** The ablated mass,  $m$ , was calculated using Eq. 1<sup>1</sup> where  $\rho$  is the density of the substrate,  $w_o$  is the spot size (i.e., the size of mesh opening),  $D$  is the thermal diffusivity,  $\tau$  is the laser pulse time,  $\varphi_o$  is the laser fluence,  $\varphi_a$  is the material threshold fluence of the substrate and  $\chi$  is the attenuation factor ( $\chi = 0.5$  in this work). The laser fluence was calculated using Eq. 2, where  $P$  is the maximum power of the laser,  $p$  is the fraction of laser power used for ablation,  $d$  is the mesh opening size and  $a$  is the correction factor to account for energy loss due to the scattering/blocking of the laser beam from the mesh and loss of heat to the surroundings ( $a = 0.145$  in this work). The residence time of the laser,  $t$ , was calculated using Eq. 3, where  $s$  is the fraction of speed used in ablation and  $S$  is the maximum linear speed of the laser beam. The material threshold fluence was calculated using Eq. 4<sup>2</sup> where  $C$  is the heat capacity of the substrate and  $T_v$  is the vaporization temperature or thermal degradation temperature if the material degrades before vaporization<sup>4</sup>. The thermal diffusivity,  $D$ , was calculated using Eq. 5<sup>5</sup> where  $K$  is the thermal conductivity of the material. The values of the parameters described above are presented in Table S1.

**Table S1. Parameters for modeling laser ablation of polymer and the associated values used in this work.**

| Parameter | Value         | Reference           |
|-----------|---------------|---------------------|
| $\tau$    | 280 $\mu s$   | equipment datasheet |
| $w_o$     | 130 $\mu m$   | equipment datasheet |
| $\rho$    | 1300 $Kg/m^3$ | 6                   |
| $P$       | 60 $W$        | equipment datasheet |
| $S$       | 1.27 $m/s$    | equipment datasheet |
| $T_v$     | 540 $K$       | 4                   |
| $d$       | 50 $\mu m$    | material datasheet  |
| $C$       | 1464 $J/kgK$  | 6                   |

$$m = \frac{8\pi\rho w_o^2}{3} \sqrt{D\tau} (2\sqrt{2} - 1) \ln\left(\chi \frac{\varphi_o}{\varphi_a}\right) \quad (1)$$

$$\varphi_o = a\left(\frac{pPt}{d^2}\right) \quad (2)$$

$$t = d/sS \quad (3)$$

$$\varphi_a = 2C\rho T_v \sqrt{\pi D t} \quad (4)$$

$$D = K/\rho C \quad (5)$$

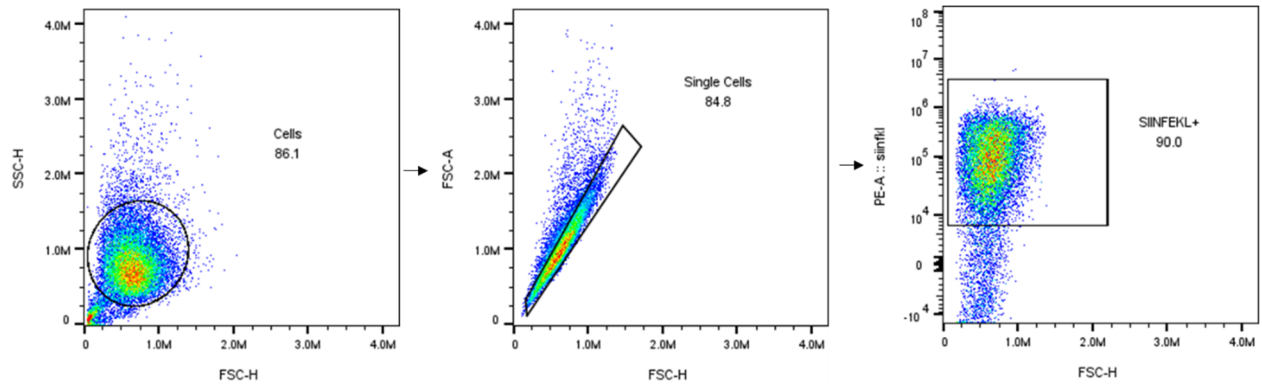

**Figure S4.** SIINFEKL expression in LLC cells. LLC cells were stained with SIINFEKL-specific PE antibody and analyzed using flow cytometry to determine the expression levels of the SIINFEKL antigen. SIINFEKL positive cells were gated on single cells.

## References

- (1) Sinko, J. E.; Phipps, C. R.; Sasoh, A. Modeling CO<sub>2</sub> Laser Ablative Impulse with Polymers. *AIP Conf. Proc.* **2010**, *1278*, 699–709. <https://doi.org/10.1063/1.3507163>.
- (2) Sinko, J. E.; Phipps, C. R.; Tsukiyama, Y.; Ogita, N.; Sasoh, A.; Umehara, N.; Gregory, D. A. Critical Fluences and Modeling of CO<sub>2</sub> Laser Ablation of Polyoxymethylene from Vaporization to the Plasma Regime. In *AIP Conference Proceedings*; 2010; Vol. 1230, pp 395–407.
- (3) John E. Sinko; Claude R. Phipps; Yosuke Tsukiyama; Naoya Ogita; Akihiro Sasoh; Noritsugu Umehara; Don A. Gregory. Critical Fluences And Modeling Of CO<sub>2</sub> Laser Ablation Polyoxymethylene From Vaporization To The Plasma Regime. *AIP Conf. Proc.* **2010**, *1230*, 395–407.
- (4) Kenji KAMIDE, M. S. Thermal Analysis of Cellulose Acetate Solids with Total Degree of 0.49, 1.75, 2.46, and 2.92. *Polym. J.* **1985**, *17* (8), 919–928.
- (5) Salazar, A. On Thermal Diffusivity. *Eur. J. Phys.* **2003**, *24* (4), 351–358. <https://doi.org/10.1088/0143-0807/24/4/353>.
- (6) Verros, G. D.; Malamataris, N. A. Estimation of Diffusion Coefficients in Acetone - Cellulose Acetate Solutions. *Ind. Eng. Chem. Res.* **1999**, *38* (9), 3572–3580. <https://doi.org/10.1021/ie990141d>.
